# Supplementary material for: Multilevel Regulation of Peroxisomal Proteome by Post-Translational Modifications
Source: PubMed Central journal article supplement (PMC6801620; doi:10.3390/ijms20194881), 2019-10-01
Supplement: ijms-20-04881-s001.pdf [file ijms-20-04881-s001.pdf]

**Supplemental Table S1: Putative peroxisomal protein targets of different PTMs**

| <b>Locus</b>                 | <b>Description</b>                                                      | <b>PTM_Types</b>                 | <b>Number_PTMs</b> |
|------------------------------|-------------------------------------------------------------------------|----------------------------------|--------------------|
| <b>PEROXISOME BIOGENESIS</b> |                                                                         |                                  |                    |
| AT1G01820                    | peroxin 11c                                                             | ac; ph                           | 2                  |
| AT1G47750                    | peroxin 11a                                                             | ph                               | 1                  |
| AT2G45740                    | peroxin 11d                                                             | na; nt; ph                       | 3                  |
| AT3G21865                    | peroxin 22                                                              | na; nt; ph                       | 3                  |
| AT3G07560                    | peroxin 13                                                              | ph                               | 1                  |
| AT1G48635                    | peroxin 3                                                               | ph                               | 1                  |
| AT2G26350                    | peroxin 10                                                              | ph                               | 1                  |
| AT3G03490                    | peroxin 19-1                                                            | no; ph                           | 2                  |
| AT5G17550                    | peroxin 19-2                                                            | na; nt                           | 2                  |
| AT5G56290                    | peroxin 5                                                               | ph                               | 1                  |
| AT5G62810                    | peroxin 14                                                              | na; nt; og; ph                   | 4                  |
| AT4G33650                    | dynammin-related protein 3A                                             | ac; nt; ph                       | 3                  |
| AT1G06460                    | alpha-crystallin domain 32.1                                            | ph                               | 1                  |
| <b>AMINO ACID METABOLISM</b> |                                                                         |                                  |                    |
| AT5G16290                    | VALINE-TOLERANT 1                                                       | na; nt; ro                       | 3                  |
| AT1G07180                    | alternative NAD(P)H dehydrogenase 1                                     | ph; ub                           | 2                  |
| AT1G11840                    | glyoxalase/bleomycin resistance protein/dioxygenase superfamily protein | ac; na; nt; sf                   | 4                  |
| AT1G13440                    | glyceraldehyde-3-phosphate dehydrogenase C2                             | ac; mo; na; nt; ph               | 5                  |
| AT1G49350                    | pfkB-like carbohydrate kinase family protein                            | ph                               | 1                  |
| AT1G49670                    | ARP protein                                                             | ac; na; no; ph; ro               | 5                  |
| AT1G52400                    | beta glucosidase 18                                                     | ac; ng; no                       | 3                  |
| AT1G69960                    | serine/threonine protein phosphatase 2A                                 | no; nt; ps                       | 3                  |
| AT1G74910                    | ADP-glucose pyrophosphorylase family protein                            | na; ph                           | 2                  |
| AT2G06050                    | oxophytodienoate-reductase 3                                            | na; nt; ps                       | 2                  |
| AT2G18630                    | transmembrane protein; putative (DUF677)                                | ph; ntyr                         | 2                  |
| AT2G21660                    | cold; circadian rhythm; and rna binding 2                               | ac; na; nt; og; ph; sm; ub; ntyr | 8                  |

Suppl. Table S1 (cont.)

| Locus         | Description                                                             | PTM_Types          | Number_PTM_Types |
|---------------|-------------------------------------------------------------------------|--------------------|------------------|
| AT1G20480     | AMP-dependent synthetase and ligase family protein                      | nt                 | 1                |
| AT1G20510     | OPC-8:0 CoA ligase1                                                     | no                 | 1                |
| AT1G31910     | GHMP kinase family protein                                              | na; nt; ph; ps     | 4                |
| AT1G65880     | benzoyloxyglucosinolate 1                                               | nt                 | 1                |
| AT2G26250     | 3-ketoacyl-CoA synthase 10                                              | ng; nt; ph         | 3                |
| AT2G29340     | NAD-dependent epimerase/dehydratase family protein                      | no                 | 1                |
| AT2G30490     | cinnamate-4-hydroxylase                                                 | ac                 | 1                |
| AT2G31790     | UDP-Glycosyltransferase superfamily protein                             | ac                 | 1                |
| AT2G44490     | Glycosyl hydrolase superfamily protein                                  | ac; na; no; nt; ps | 5                |
| AT3G02780     | isopentenyl pyrophosphate:dimethylallyl pyrophosphate isomerase 2       | na; no; nt         | 3                |
| AT3G14210     | GDSL-like lipase/acylhydrolase superfamily protein                      | ac; mo; ng; nt     | 4                |
| AT3G48170     | aldehyde dehydrogenase 10A9                                             | ac; mo; no; ph; ub | 5                |
| AT4G05160     | AMP-dependent synthetase and ligase family protein                      | ac; na; nt; ps     | 4                |
| AT4G16330     | 2-oxoglutarate (2OG) and Fe(II)-dependent oxygenase superfamily protein | no                 | 1                |
| AT5G16440     | isopentenyl diphosphate isomerase 1                                     | mo; na; nt         | 3                |
| AT5G25980     | glucoside glucohydrolase 2                                              | ac; mo; ng; no; nt | 5                |
| AT5G26000     | thioglucoside glucohydrolase 1                                          | ac; mo; ng; no; nt | 5                |
| AT5G47720     | Thiolase family protein                                                 | ac; nt             | 2                |
| AT5G48230     | acetoacetyl-CoA thiolase 2                                              | ac; na; nt; ph; ro | 5                |
| <b>OTHERS</b> |                                                                         |                    |                  |
| AT1G10430     | protein phosphatase 2A-2                                                | no; nt; ps         | 3                |
| AT1G26930     | Galactose oxidase/kelch repeat superfamily protein                      | ub                 | 1                |
| AT1G28320     | protease-like protein                                                   | na                 | 1                |
| AT1G50510     | indigoidine synthase A family protein                                   | na; nt; ro; ub     | 4                |
| AT1G52410     | TSK-associating protein 1                                               | ac; ng; nt         | 3                |
| AT2G02510     | NADH dehydrogenase (ubiquinone)s                                        | na; nt; ub         | 3                |
| AT2G14120     | dynamamin related protein                                               | ac; na; ph         | 3                |
| AT2G33830     | Dormancy/auxin associated family                                        | Ph                 | 1                |
| AT2G24580     | FAD-dependent oxidoreductase family protein                             | no                 | 1                |
| AT1G76180     | Dehydrin family protein (as chaperone)                                  | ph                 | 1                |

**Suppl. Table S1 (cont.)**

| <b>Locus</b> | <b>Description</b>                                                                        | <b>PTM_Types</b>             | <b>Number_PTM_Types</b> |
|--------------|-------------------------------------------------------------------------------------------|------------------------------|-------------------------|
| AT5G43940    | S-nitrosoglutathione reductase                                                            | no; ph                       | 2                       |
| AT2G26230    | uricase / urate oxidase / nodulin 35                                                      | na; nt; ps                   | 3                       |
| AT2G26300    | G protein alpha subunit 1                                                                 | ph                           | 1                       |
| AT2G26340    | hypothetical protein                                                                      | ph                           | 1                       |
| AT2G26540    | uroporphyrinogen-III synthase family protein                                              | ac; na; nt; ph               | 4                       |
| AT2G26560    | phospholipase A 2A                                                                        | na; no; nt                   | 3                       |
| AT2G26730    | Leucine-rich repeat protein kinase family protein                                         | ng; ph                       | 2                       |
| AT2G26750    | alpha/beta-Hydrolases superfamily protein                                                 | ph                           | 1                       |
| AT2G26890    | DNAJ heat shock N-terminal domain-containing protein                                      | ph; ro; ub                   | 3                       |
| AT2G26910    | pleiotropic drug resistance 4                                                             | ac; ng; ph                   | 3                       |
| AT2G26980    | CBL-interacting protein kinase 3                                                          | ph                           | 1                       |
| AT2G27020    | 20S proteasome alpha subunit G1                                                           | ac; mo; na; nt; ph           | 5                       |
| AT2G27030    | calmodulin 5                                                                              | ac; na; no; nt; ph; ub       | 6                       |
| AT2G27130    | Bifunctional inhibitor/lipid-transfer protein/seed storage 2S albumin superfamily protein | ro                           | 1                       |
| AT2G27210    | BR11 suppressor 1 (BSU1)-like 3                                                           | no; ph; ro                   | 3                       |
| AT2G27490    | dephospho-CoA kinase family                                                               | ub                           | 1                       |
| AT2G27600    | AAA-type ATPase family protein                                                            | na; no; ub                   | 3                       |
| AT2G27680    | NAD(P)-linked oxidoreductase superfamily protein                                          | ac; no                       | 2                       |
| AT2G27730    | copper ion binding protein                                                                | ac; nt; ub                   | 3                       |
| AT2G27960    | cyclin-dependent kinase-subunit 1                                                         | nt; ub                       | 2                       |
| AT2G28000    | chaperonin-60alpha                                                                        | ac; mo; na; nt; ph; ub; ntyr | 7                       |
| AT2G28680    | RmlC-like cupins superfamily protein                                                      | na; ph                       | 2                       |
| AT2G29330    | tropinone reductase                                                                       | no                           | 1                       |
| AT2G29350    | senescence-associated gene 13                                                             | na; no; nt                   | 3                       |
| AT2G29370    | NAD(P)-binding Rossmann-fold superfamily protein                                          | ph                           | 1                       |
| AT2G29450    | glutathione S-transferase tau 5                                                           | ac; na; nt                   | 3                       |
| AT2G29530    | Tim10/DDP family zinc finger protein                                                      | na; nt; ro; ub               | 4                       |
| AT2G30520    | Phototropic-responsive NPH3 family protein                                                | ac; mo; na; nt; ph           | 5                       |
| AT2G30740    | Protein kinase superfamily protein                                                        | ac; ph                       | 2                       |
| AT2G30860    | glutathione S-transferase PHI 9                                                           | ac; mo; na; nt; ph           | 5                       |
| AT2G30870    | glutathione S-transferase PHI 10                                                          | ac; nt; ph                   | 3                       |

**Suppl. Table S1 (cont.)**

| <b>Locus</b> | <b>Description</b>                                                       | <b>PTM_Types</b>       | <b>Number_PTMs</b> |
|--------------|--------------------------------------------------------------------------|------------------------|--------------------|
| AT2G30930    | hypothetical protein                                                     | ac; na; nt; ph         | 4                  |
| AT2G30950    | FtsH extracellular protease family                                       | ac; nt; ph             | 3                  |
| AT2G30970    | aspartate aminotransferase 1                                             | ac; no; nt             | 3                  |
| AT2G31670    | Stress responsive alpha-beta barrel domain protein                       | ac; na; nt; ph; ps     | 5                  |
| AT2G31680    | RAB GTPase homolog A5D                                                   | na; ph; ub             | 3                  |
| AT2G31725    | FAM136A-like protein (DUF842)                                            | na                     | 1                  |
| AT2G31750    | UDP-glucosyl transferase 74D1                                            | no                     | 1                  |
| AT2G31810    | ACT domain-containing small subunit of acetolactate synthase protein     | nt                     | 1                  |
| AT2G31880    | Leucine-rich repeat protein kinase family protein                        | ng; ph                 | 2                  |
| AT2G32080    | purin-rich alpha 1                                                       | na; og; ph             | 3                  |
| AT2G41790    | Insulinase (Peptidase family M16) family protein                         | ac; na; ng; nt; ph; ps | 6                  |
| AT2G42490    | Copper amine oxidase family protein                                      | na; nt                 | 2                  |
| AT2G43940    | S-adenosyl-L-methionine-dependent methyltransferases superfamily protein | na; ph                 | 2                  |
| AT2G45690    | shrunken seed protein (SSE1)                                             | ph; ub                 | 2                  |
| AT3G01910    | sulfite oxidase                                                          | nt; ub; ps             | 3                  |
| AT3G02360    | 6-phosphogluconate dehydrogenase family protein                          | ac; no; nt; ph; ro; ps | 6                  |
| AT3G09260    | Glycosyl hydrolase superfamily protein                                   | ac; ng; nt             | 3                  |
| AT3G12800    | short-chain dehydrogenase-reductase B                                    | na; nt; ps             | 3                  |
| AT3G15290    | 3-hydroxyacyl-CoA dehydrogenase family protein                           | ac; na; nt; ph         | 4                  |
| AT3G15950    | DNA topoisomerase-like protein                                           | ac; ng; nt             | 3                  |
| AT3G17420    | glyoxysomal protein kinase 1                                             | ph                     | 1                  |
| AT3G19570    | SNOWY COTYLEDON protein (DUF566)                                         | ph                     | 1                  |
| AT3G25800    | protein phosphatase 2A subunit A2                                        | ac; na; nt; ro; ps     | 5                  |
| AT3G46060    | RAB GTPase homolog 8A                                                    | ac; ph                 | 2                  |
| AT3G48140    | B12D protein                                                             | ac                     | 1                  |
| AT3G55040    | glutathione transferase lambda 2                                         | nt                     | 1                  |
| AT3G55270    | mitogen-activated protein kinase phosphatase 1                           | ph                     | 1                  |
| AT3G56460    | GroES-like zinc-binding alcohol dehydrogenase family protein             | na; ph                 | 2                  |
| AT3G56490    | HIS triad family protein 3                                               | no; ph; ub; ps         | 4                  |
| AT3G57090    | Tetratricopeptide repeat (TPR)-like superfamily protein                  | ac; na; ph             | 3                  |

**Suppl. Table S1 (cont.)**

| <b>Locus</b> | <b>Description</b>                                                     | <b>PTM_Types</b>                   | <b>Number_PTMs</b> |
|--------------|------------------------------------------------------------------------|------------------------------------|--------------------|
| AT3G57810    | Cysteine proteinases superfamily protein                               | nt; ph; ub                         | 3                  |
| AT3G58510    | DEA(D/H)-box RNA helicase family protein                               | ac; na; no; nt; ph; ro; sf         | 7                  |
| AT3G58840    | Tropomyosin-like protein                                               | nt; ub                             | 2                  |
| AT3G60680    | DUF641 family protein (DUF641)                                         | ph                                 | 1                  |
| AT3G61200    | Thioesterase superfamily protein                                       | na                                 | 1                  |
| AT3G62750    | beta glucosidase 8                                                     | ng                                 | 1                  |
| AT4G00860    | monopolar spindle protein (DUF1138)                                    | ac; na; nt; ub                     | 4                  |
| AT4G02340    | alpha/beta-Hydrolases superfamily protein                              | no; sf                             | 2                  |
| AT4G04470    | Peroxisomal membrane 22 kDa (Mpv17/PMP22) family protein               | na; nt                             | 2                  |
| AT4G05020    | NAD(P)H dehydrogenase B2                                               | nt                                 | 1                  |
| AT4G05530    | indole-3-butyric acid response 1                                       | na; nt; ub; ps                     | 4                  |
| AT4G09320    | nucleoside diphosphate kinase                                          | ac; na; no; nt; ph; ro; ub; ps; ca | 8                  |
| AT4G12735    | hypothetical protein                                                   | ph                                 | 1                  |
| AT4G12910    | serine carboxypeptidase-like 20                                        | ng; nt                             | 2                  |
| AT4G14880    | O-acetylserine (thiol) lyase (OAS-TL) isoform A1                       | ac; mo; no; nt; ph; ro; ub; ntyr   | 8                  |
| AT4G16566    | histidine triad nucleotide-binding 4                                   | na; nt                             | 2                  |
| AT4G17520    | Hyaluronan / mRNA binding family                                       | ac; mo; nt; ph; ub                 | 5                  |
| AT4G24160    | alpha/beta-Hydrolases superfamily protein                              | na                                 | 1                  |
| AT4G30760    | Putative endonuclease or glycosyl hydrolase                            | ph                                 | 1                  |
| AT4G36100    | Sec1/munc18-like (SM) proteins superfamily                             | ph                                 | 1                  |
| AT4G36880    | cysteine proteinase1                                                   | nt                                 | 1                  |
| AT4G39260    | cold; circadian rhythm; and RNA binding 1                              | ac; mo; na; no; nt; ph; sm; ub; ca | 9                  |
| AT4G39850    | peroxisomal ABC transporter 1                                          | nt; ph                             | 2                  |
| AT5G03530    | RAB GTPase homolog C2A                                                 | ph; ps                             | 2                  |
| AT5G04040    | Patatin-like phospholipase family protein                              | ph                                 | 1                  |
| AT5G04870    | calcium dependent protein kinase 1                                     | my; ph; ub                         | 3                  |
| AT5G11520    | aspartate aminotransferase 3                                           | nt; ro; ub                         | 3                  |
| AT5G11910    | alpha/beta-Hydrolases superfamily protein                              | ph                                 | 1                  |
| AT5G12390    | Tetratricopeptide repeat (TPR)-like superfamily protein                | na                                 | 1                  |
| AT5G17380    | Thiamine pyrophosphate dependent pyruvate decarboxylase family protein | ac; na; no; nt                     | 4                  |
| AT5G17920    | Cobalamin-independent synthase family protein                          | ac; mo; na; no; nt; ph; ub; ntyr   | 8                  |

**Suppl. Table S1 (cont.)**

| <b>Locus</b> | <b>Description</b>                                                                   | <b>PTM_Types</b>   | <b>Number_PTMs</b> |
|--------------|--------------------------------------------------------------------------------------|--------------------|--------------------|
| AT5G18910    | Protein kinase superfamily protein                                                   | ph                 | 1                  |
| AT5G20070    | nudix hydrolase homolog 19                                                           | nt; ph; ro         | 3                  |
| AT5G23395    | Cox19-like CHCH family protein                                                       | my; ro             | 2                  |
| AT5G24400    | NagB/RpiA/CoA transferase-like superfamily protein                                   | ac; na; nt; ph; ps | 5                  |
| AT5G27520    | peroxisomal adenine nucleotide carrier 2                                             | ac; nt             | 2                  |
| AT5G35790    | glucose-6-phosphate dehydrogenase 1                                                  | ac; nt; ps         | 3                  |
| AT5G41210    | glutathione S-transferase THETA 1                                                    | ac; na; nt; ph; ps | 5                  |
| AT5G41220    | glutathione S-transferase THETA 3                                                    | ph                 | 1                  |
| AT5G41240    | glutathione S-transferase THETA 2                                                    | ph; ps             | 2                  |
| AT5G43280    | delta(3;5);delta(2;4)-dienoyl-CoA isomerase 1                                        | nt; ph             | 2                  |
| AT5G43940    | GroES-like zinc-binding dehydrogenase family protein                                 | ac; na; nt; ro; ub | 5                  |
| AT5G47040    | lon protease 2                                                                       | na; nt; ph         | 3                  |
| AT5G47720    | Thiolase family protein                                                              | ac; nt             | 2                  |
| AT5G48370    | Thioesterase/thiol ester dehydrase-isomerase superfamily protein                     | ph                 | 1                  |
| AT5G48545    | histidine triad nucleotide-binding 3                                                 | ph                 | 1                  |
| AT5G48880    | peroxisomal 3-keto-acyl-CoA thiolase 2                                               | ac; nt; ph; ps     | 4                  |
| AT5G53570    | Ypt/Rab-GAP domain of gyp1p superfamily protein                                      | ph                 | 1                  |
| AT4G16340    | (SPIKE1); GTP binding / GTPase binding / binding / guanyl-nucleotide exchange factor | ph                 | 1                  |
| AT5G58220    | transthyretin-like protein                                                           | na; nt; ph; ps     | 4                  |
| AT5G65940    | beta-hydroxyisobutyryl-CoA hydrolase 1                                               | na; nt; ph; ps     | 4                  |
| AT1G60140    | Trehalose phosphate synthase                                                         | ph                 | 1                  |
| AT2G29300    | NAD(P)-binding Rossmann-fold superfamily protein                                     | no                 | 1                  |
| AT1G63900    | E3 Ubiquitin ligase family protein                                                   | ph                 | 1                  |
| AT2G30650    | ATP-dependent caseinolytic (Clp) protease/crotonase family protein                   | ph                 | 1                  |
| AT4G19010    | AMP-dependent synthetase and ligase family protein                                   | ph                 | 1                  |
| AT5G63380    | AMP-dependent synthetase and ligase family protein                                   | ph                 | 1                  |

Carbonylation (ca), Lysine Acetylation (ac), Lysine Ubiquitination (ub), Methionine Oxidation (mo), N-glycosylation (ng), N-terminal Acetylation (na), N-terminus Proteolysis (nt), N-terminal Ubiquitination (nu), O-GlcNAcylation (og), Phosphorylation (ph), Reversible Cysteine Oxidation (ro), S-Glutathionylation (sg), S-Nitrosylation (no), persulfidation (ps), sulfenilation (sf), nitration (ntyr)
